# Supplementary material for: Methylene violet 3RAX-conjugated porphyrin for photodynamic therapy: synthesis, DNA photocleavage, and cell study
Source: Royal Society of Chemistry journal article supplement (doi:10.1039/c7ra13176c), 2018-01-01
Supplement: c7ra13176c1.pdf [file c7ra13176c1.pdf]

### Supporting Information

#### **Methylene Violet 3RAX-Conjugated Porphyrin for Photodynamic Therapy: Synthesis, DNA Photocleavage and Cell Study**

**Table S1.** Spectral characteristics of compounds **1, 2** interacted with ct-DNA

| Compd. | UV-Vis<br>Hypochromicity (H)/<br>Bathochromicshift ( $\Delta\lambda$ ) | Fluorescence<br>emission<br>Hypochromicity (H)<br>/<br>Wavelengthshift ( $\Delta\lambda$ ) | CD<br>( $r=0.01$ )    |                       | DNA binding<br>constants ( $M^{-1}$ ) |
|--------|------------------------------------------------------------------------|--------------------------------------------------------------------------------------------|-----------------------|-----------------------|---------------------------------------|
|        |                                                                        |                                                                                            | Positive band<br>(nm) | Negative band<br>(nm) |                                       |
| 1      | 30.1%/12nm                                                             | 25.9%/-14nm                                                                                | -                     | 598                   | $7.48 \times 10^3$                    |
| 2      | 20.1%/3nm                                                              | 117.6%/-25nm                                                                               | 435                   | 422                   | $6.48 \times 10^3$                    |

The binding affinities between compound **1, 2** and DNA were expressed by the binding constant ( $K$ ), which was calculated using the equation as follows <sup>1</sup>,

$$[DNA]_{total} / |\varepsilon_A - \varepsilon_F| = [DNA]_{total} / |\varepsilon_B - \varepsilon_F| + 1 / (|\varepsilon_B - \varepsilon_F|K)$$

where  $D$  is the concentration of DNA during the process of titration.  $\varepsilon_A$  is the ratio of  $A_{max}$ / [**1, 2**] during the process of titration.  $\varepsilon_B$  is the ratio of  $A_{max}$ / [**1, 2**] after saturated with DNA and  $\varepsilon_F$  is the ratio of  $A_{max}$ / [**1, 2**] without DNA.

#### **References**

- [1] Z. Xue, A. X. Hou, D. W. J. Kwong and W. K. Wong, *Bioorg. Med. Chem. Lett.*, 2007, **17**, 4266-4270.
